# Supplementary material for: The Prognostic Value and Immunological Role of STEAP1 in Pan‐Cancer: A Result of Data‐Based Analysis
Source: Hindawi journal article supplement (doi:10.1155/2022/8297011), 2022-01-01

**a**

Protein expression of STEAP1 in Breast cancer

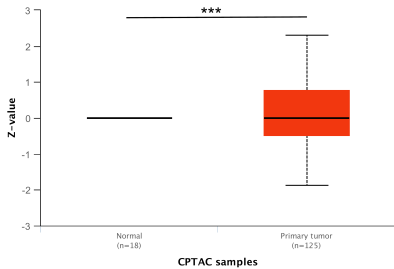**b**

Protein expression of STEAP1 in Colon cancer

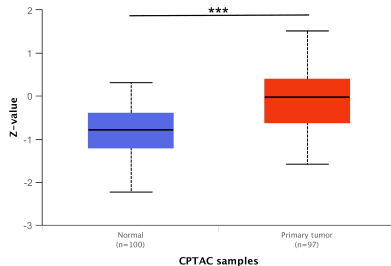**c**

Protein expression of STEAP1 in Lung adenocarcinoma

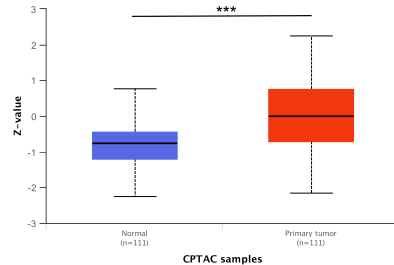**d**

Protein expression of STEAP1 in UCEC

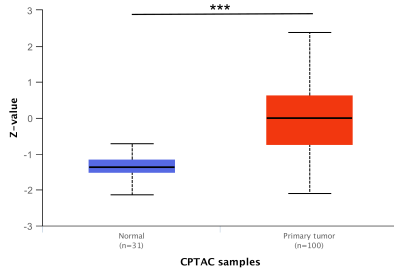**e**

Protein expression of STEAP1 in Ovarian cancer

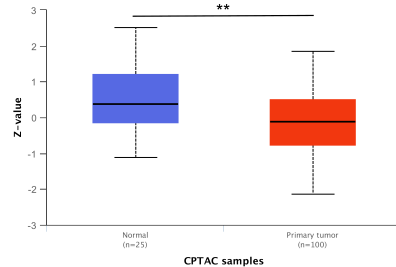

Supplement: f7 [file 8297011.f7.pdf]
