# Supplementary material for: The Prognostic Value and Immunological Role of STEAP1 in Pan‐Cancer: A Result of Data‐Based Analysis
Source: Hindawi journal article supplement (doi:10.1155/2022/8297011), 2022-01-01

**a**

BRCA

Spearman  $r=-0.11$ ; P-value= $1.49e-03$ 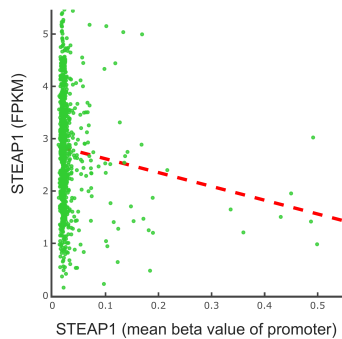**b**

COAD

Spearman  $r=0.11$ ; P-value= $4.27e-02$ 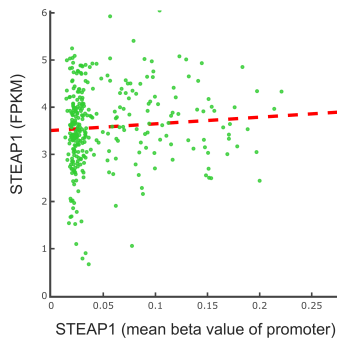**c**

LUSC

Spearman  $r=0.11$ ; P-value= $3.62e-02$ 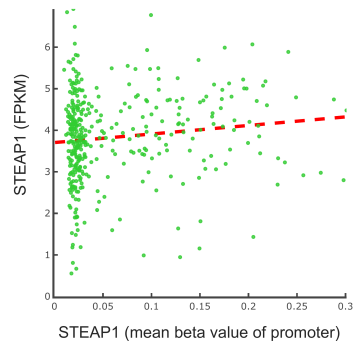**d**

PRAD

Spearman  $r=-0.1$ ; P-value= $1.96e-02$ 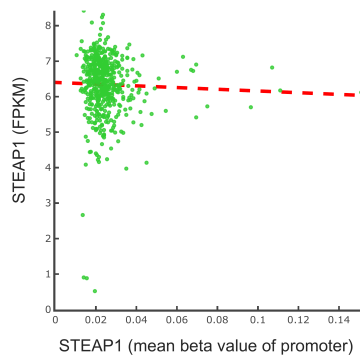**e**

SKCM

Spearman  $r=-0.14$ ; P-value= $2.38e-03$ 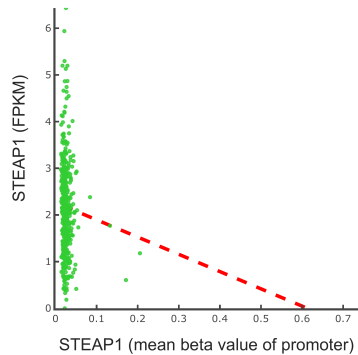**f**

UCEC

Spearman  $r=-0.52$ ; P-value= $2.73e-33$ 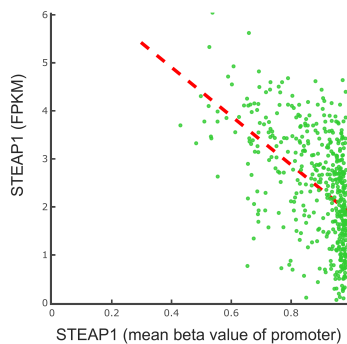

Supplement: f8 [file 8297011.f8.pdf]
