# Supplementary material for: The Prognostic Value and Immunological Role of STEAP1 in Pan‐Cancer: A Result of Data‐Based Analysis
Source: Hindawi journal article supplement (doi:10.1155/2022/8297011), 2022-01-01

**a**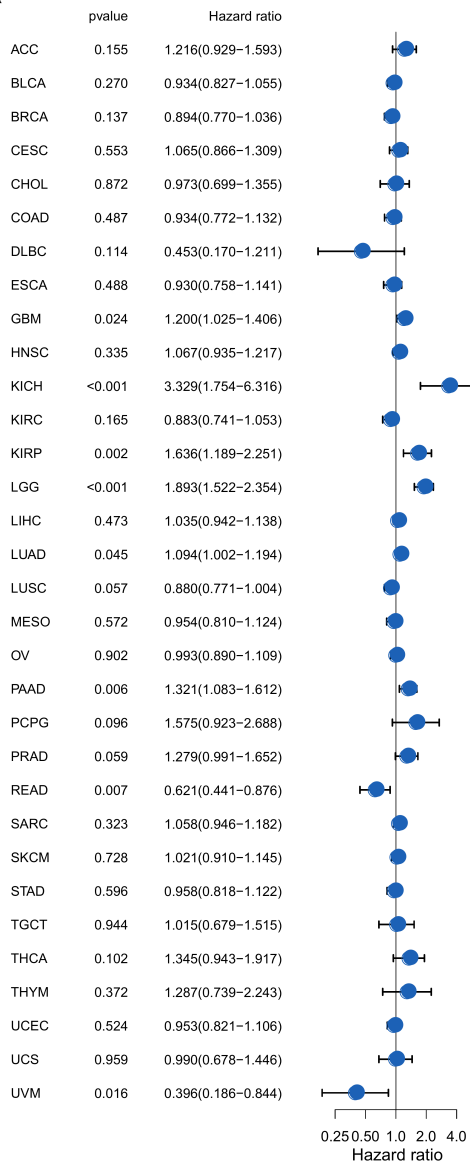**b**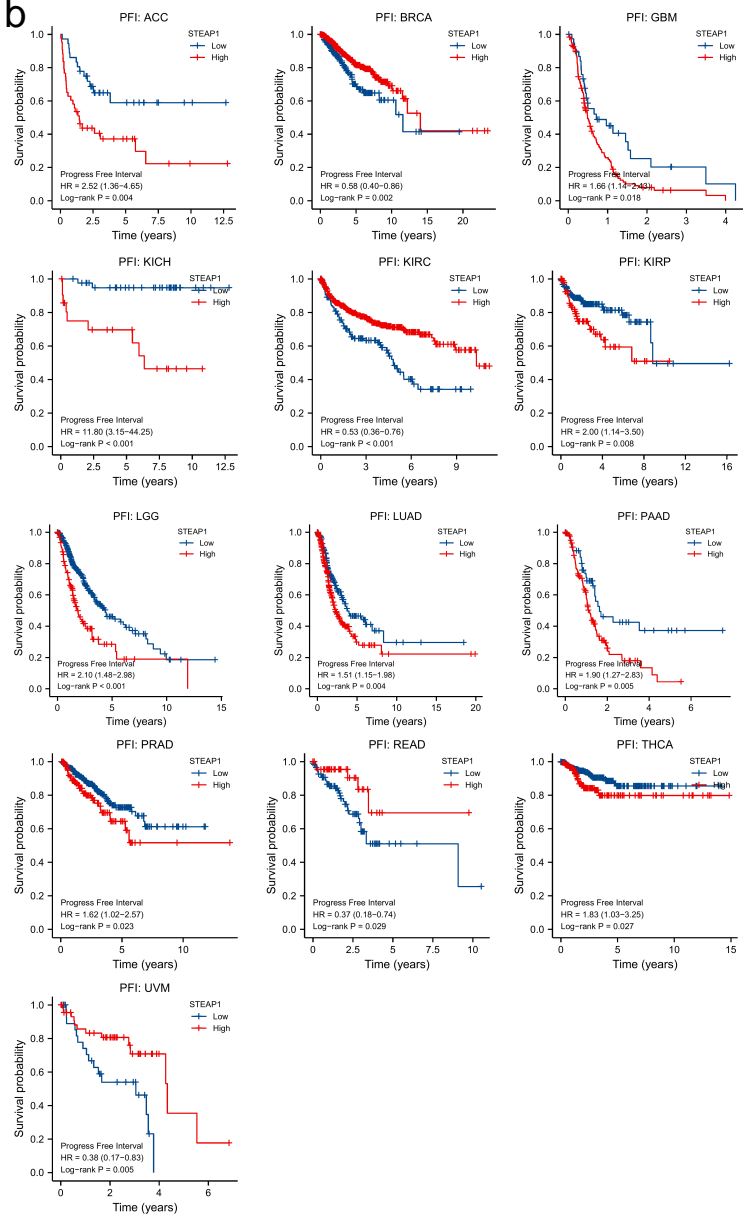

Supplement: f10 [file 8297011.f10.pdf]
